# Supplementary material
Source: Springer Nature journal article supplement (https://www.springermedizin.de/resource/supplementary/12904_2013_219_MOESM2_ESM.docx/9517792)
Supplement: MOESM2 [file 9517792]

Figure 2 Findings across the Delivering Choice Programme
